# Supplementary material
Source: publisher figshare collection journal article supplement (https://tandf.figshare.com/articles/dataset/_/24961328)
Supplement: Supplementary file 1 [file 43955363]

**Botanical description, phytochemical constituents, ethnobotany, traditional medicinal use, and pharmacological activities of *Stachys lavandulifolia* Vahl.**

Dara Dastan<sup>1</sup>, Christopher Dobie<sup>2,3</sup>, *Reza Zadali*<sup>4</sup>, Mouhamad Hassan Pourrashid<sup>5</sup>, Danielle Skropeta<sup>2,3,\*</sup>, Mansour Miran<sup>6,\*</sup>

<sup>1</sup>Department of Pharmacognosy, School of Pharmacy, Medicinal Plants and Natural Products Research Center, Hamadan University of Medical Sciences, Hamadan, Iran.

<sup>2</sup>School of Chemistry & Molecular Bioscience, Faculty of Science, Medicine & Health; and Molecular Horizons, University of Wollongong, NSW, 2522, Australia.

<sup>3</sup>Illawarra Health & Medical Research Institute, Wollongong, NSW, 2522, Australia.

<sup>4</sup>Department of Pharmacognosy, Faculty of Pharmacy, Islamic Azad University-Damghan Branch, Iran.

<sup>5</sup>Department of clinical pharmacy, school of pharmacy, Ardabil University of Medical Sciences, Ardabil, Iran

<sup>6</sup>Department of Medicinal Chemistry and Pharmacognosy, School of Pharmacy, Ardabil University of Medical Sciences, Ardabil, Iran.

\*Corresponding authors: Mansour Miran, Tel: +45-33522437, Fax: +45-33522197, E-mail: [m.miran@arums.ac.ir](mailto:m.miran@arums.ac.ir); [mansour.miran@gmail.com](mailto:mansour.miran@gmail.com).

Danielle Skropeta, Tel: +61-2-42214360, Fax: +61-2-42214360, E-mail: [skropeta@uow.edu.au](mailto:skropeta@uow.edu.au).

## Abstract

*Stachys lavandulifolia* Vahl known as “mountain tea”, is a perennial flowering plant belonging to the Lamiaceae family and is widespread in Iran, Armenia, Azerbaijan, Iraq, Turkey and Turkmenistan. *S. lavandulifolia* is widely used in traditional medicine for its analgesic, anti-inflammatory and anxiolytic properties. This plant has different chemical compounds classes including terpenoids, iridoids, flavonoids and phenylethanoids that have been isolated from the aerial parts of it. This review covers the plant botany, traditional medicinal uses and chemical composition of *S. lavandulifolia*, along with its biological and pharmacological activities including clinical trial data. The information of this review article was obtained from different scientific databases such as Google scholar, Science Direct, Hindawi, SID, Scopus, PubMed, and ACS as well as traditional Persian books. Pharmacological and clinical studies, especially Anxiolytic activity and anti-inflammatory on the plant are relatively low, so these studies are suggested in the future. Also, phytochemical investigation on root of the plant is necessary.

## Keywords:

*Stachys lavandulifolia*, mountain tea, pharmacological activity, traditional medicine, Botanical description, phytochemical constituents.

## Figure captions

Figure S1. Photograph of different samples of *S. lavandulifolia* by Khadivi-Khub *et al* (Khadivi-Khub *et al.* 2014).

Figure S2. The main chemical constituents of *S. lavandulifolia* oil (germacrene-D (1),  $\beta$ -phellandrene (2),  $\alpha$ -pinene (3),  $\beta$ -pinene (4), myrcene (5), ocimene (6) and spathulenol (7)).

Figure S3. Iridoids isolated from the aerial parts of *S. lavandulifolia*, monomelittoside (8), melittoside (9), 5-alloxyloxy-aucubin (10).

Figure S4. Flavonoids isolated from the aerial parts of *S. lavandulifolia*, pachypodol (11), chrysoplenetin (12), kumatakenin (13), velutin (14), penduletin (15), viscosine (16), chrysoeriol (17), hydroxygenkwanin (18) and apigenin (19).

Figure S5. Flavonoid glycosides from the aerial parts of *S. lavandulifolia* include chrysoeriol-7-O- $\beta$ -D-glucopyranoside (20), apigenin-7-O-(6''-O-acetyl)- $\beta$ -D-glucopyranoside (21), luteolin-7-O- $\beta$ -D-glucopyranoside (22) and apigenin-7-O- $\beta$ -Dglucopyranoside (23).

Figure S6. Phenylpropanoids isolated from the aerial parts of *S. lavandulifolia*, lavandulifolioside A (24), verbascoside (25), lavandulifolioside B (26), and leucosceptoside A (27).

Figure S7. Diterpenoids stachysolone (28) and labda-13-en-8,15-diol (29) obtained from the aerial parts of *S. lavandulifolia*.

Figure S1

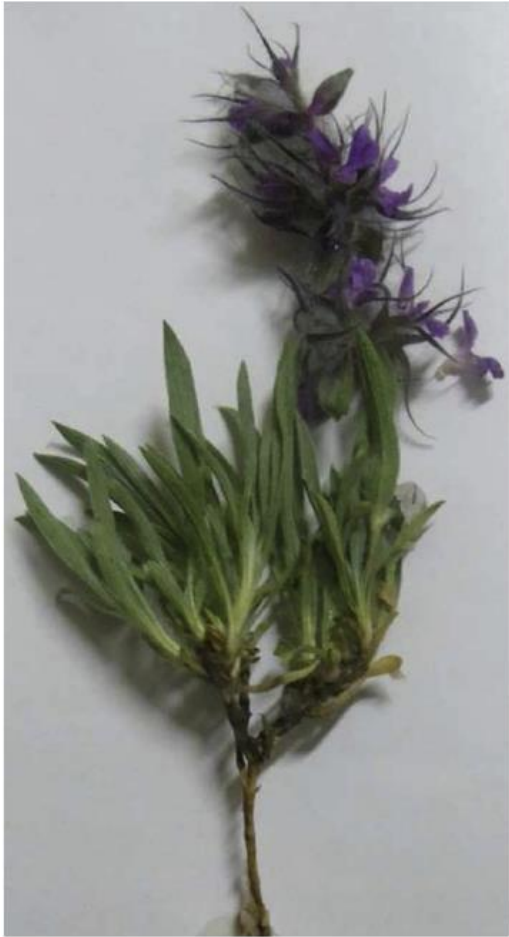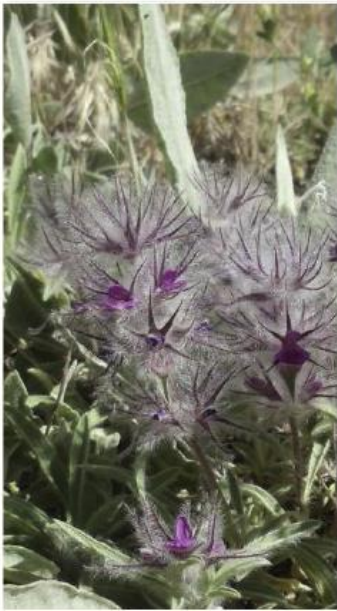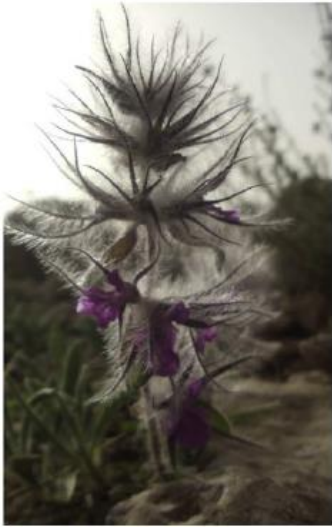

Figure S2

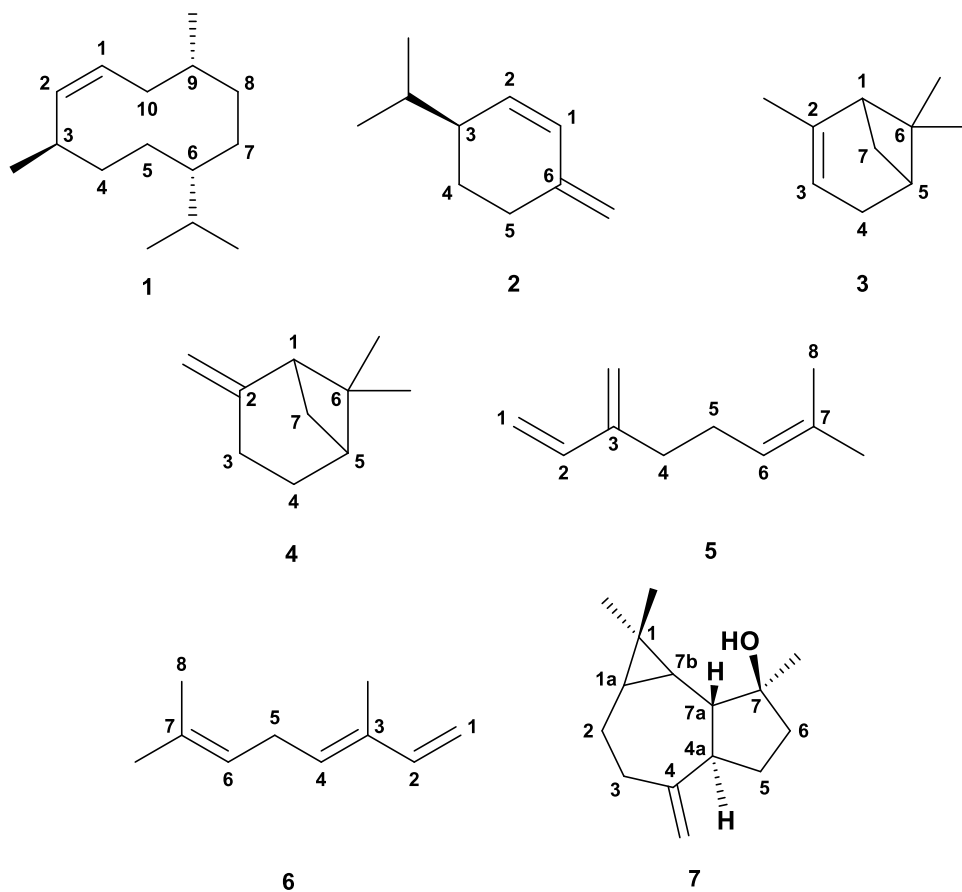

Figure S3

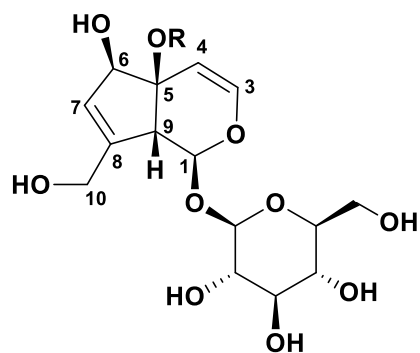

| Comp | R            |
|------|--------------|
| 8    | H            |
| 9    | Beta glucose |
| 10   | Beta allose  |

Figure S4

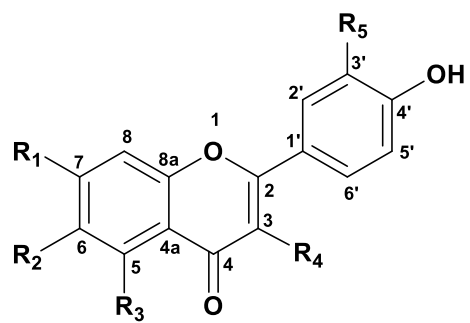

| Comp | R <sub>1</sub> | R <sub>2</sub> | R <sub>3</sub> | R <sub>4</sub> | R <sub>5</sub> |
|------|----------------|----------------|----------------|----------------|----------------|
| 11   | OMe            | H              | OH             | OMe            | OMe            |
| 12   | OMe            | H              | OMe            | OMe            | OMe            |
| 13   | OMe            | H              | OH             | OMe            | H              |
| 14   | OMe            | H              | OH             | H              | OMe            |
| 15   | OMe            | OMe            | OH             | OMe            | H              |
| 16   | OH             | OMe            | OH             | OMe            | H              |
| 17   | OH             | H              | OH             | H              | OMe            |
| 18   | OH             | H              | OH             | H              | OH             |
| 19   | OH             | H              | OH             | H              | H              |

Figure S5

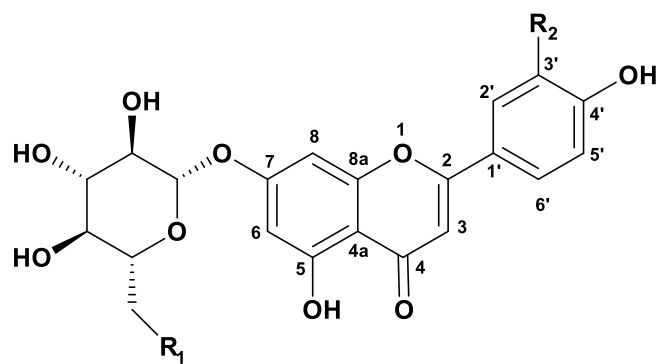

| Comp | R <sub>1</sub>     | R <sub>2</sub>   |
|------|--------------------|------------------|
| 20   | OH                 | OCH <sub>3</sub> |
| 21   | OCOCH <sub>3</sub> | H                |
| 22   | OH                 | OH               |
| 23   | H                  | OH               |



Figure S6

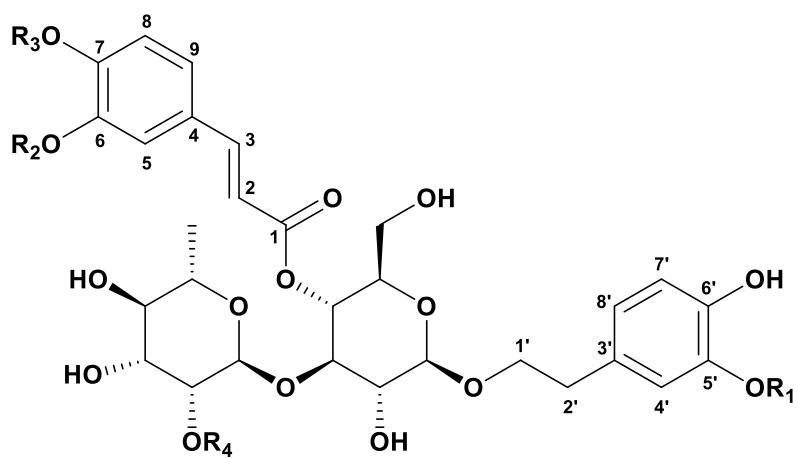

| Comp      | R1 | R2 | R3 | R4                      |
|-----------|----|----|----|-------------------------|
| <b>24</b> | H  | H  | H  | Beta-D-arabinopyranosyl |
| <b>25</b> | H  | H  | H  | H                       |
| <b>26</b> | Me | Me | Me | Beta-D-arabinopyranosyl |
| <b>27</b> | H  | Me | H  | H                       |

Figure S7

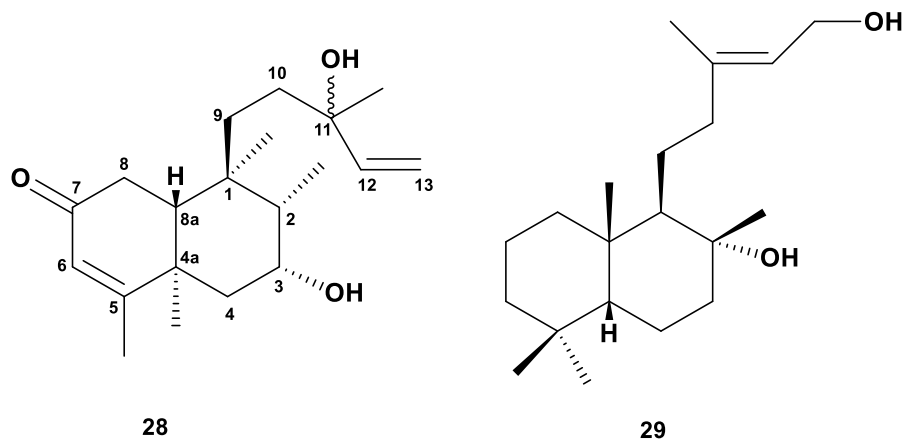

Table captions:

Table S1. Chemical composition of the essential oil from aerial parts of *S. lavandulifolia* from different regions of Iran.

Table S2. The pharmacological profiles of *S. lavandulifolia* and its phytochemicals

Table S1

| Compounds                              | Formula                                       | K                | A      | B | C      | D      | E      | F      | G      | H      | I | J      | K      | L | M      | N      | O      | P      | Q      | R | S | T | U      | V | W | X |
|----------------------------------------|-----------------------------------------------|------------------|--------|---|--------|--------|--------|--------|--------|--------|---|--------|--------|---|--------|--------|--------|--------|--------|---|---|---|--------|---|---|---|
| <b>4-Hydroxy-4-methyl-2-pentano ne</b> | C <sub>6</sub> H <sub>12</sub> O <sub>2</sub> | 8<br>3<br>1      |        |   |        |        |        |        |        |        |   |        |        | 9 |        |        |        |        |        |   |   |   |        |   |   |   |
| <b>α-Thujene</b>                       | C <sub>10</sub> H <sub>16</sub>               | 9<br>2<br>4      |        |   | 1<br>6 | 2<br>4 |        |        |        |        |   |        |        |   | 1<br>3 | 2<br>4 | 2<br>6 | 3<br>2 |        |   |   |   |        |   |   |   |
| <b>α-Pinene</b>                        | C <sub>10</sub> H <sub>16</sub>               | 9<br>3<br>2      | 5      |   |        |        | 2<br>0 | 8      | 1<br>4 | 4<br>9 | 8 | 3<br>9 | 3<br>3 | 8 |        |        |        | 3<br>7 |        |   |   | 8 |        |   | 6 |   |
| Benzaldehyde                           | C <sub>7</sub> H <sub>6</sub> O               | 9<br>5<br>2      |        |   |        |        |        |        |        |        |   |        |        |   |        | 6      |        | 3      |        |   |   |   |        |   |   |   |
| Sabinene                               | C <sub>10</sub> H <sub>16</sub>               | 9<br>6<br>9      |        |   |        | 3      |        |        |        |        |   | 3      |        |   | 4      |        | 5<br>2 |        |        |   |   |   |        |   |   |   |
| <b>β-Pinene</b>                        | C <sub>10</sub> H <sub>16</sub>               | 9<br>7<br>4      |        |   |        |        | 1<br>2 | 1<br>0 | 7      | 2<br>2 |   | 2      | 5      |   | 3      |        | 2      |        |        |   |   |   |        |   |   |   |
| cis-m-Mentha-2,8-diene                 | C <sub>10</sub> H <sub>16</sub>               | 9<br>8<br>3      |        |   |        |        |        |        |        |        |   |        |        |   |        |        |        |        |        |   |   | 4 |        | 3 | 3 |   |
| <b>Myrcene</b>                         | C <sub>10</sub> H <sub>16</sub>               | 9<br>8<br>8      | 4      | 4 | 4      |        |        | 9      | 5      | 2      |   | 1<br>0 | 4<br>2 |   | 1<br>6 | 4      | 7      |        | 6      | 6 |   | 5 | 6      |   | 3 |   |
| <b>Decane</b>                          | C <sub>10</sub> H <sub>22</sub>               | 1<br>0<br>0<br>0 |        |   |        |        |        |        |        |        |   |        |        |   |        |        |        |        |        |   |   |   |        |   | 6 |   |
| <b>α-Phellandrene</b>                  | C <sub>10</sub> H <sub>16</sub>               | 1<br>0<br>0<br>2 |        |   |        |        |        |        |        |        |   |        |        |   | 7      |        | 3      | 1<br>4 |        |   |   |   |        |   |   |   |
| Carene <δ-3->                          | C <sub>10</sub> H <sub>16</sub>               | 1<br>0<br>0<br>8 | 2      |   |        |        |        |        |        |        |   |        |        |   |        |        |        |        |        |   |   |   |        |   |   |   |
| <b>Limonene</b>                        | C <sub>10</sub> H <sub>16</sub>               | 1<br>0<br>2<br>4 | 1<br>5 | 5 |        |        |        |        |        |        |   |        |        | 2 |        |        |        |        |        | 8 |   | 3 | 2<br>4 |   |   |   |
| <b>β-Phellandrene</b>                  | C <sub>10</sub> H <sub>16</sub>               | 1<br>0<br>2<br>5 |        |   | 1<br>4 | 2<br>8 | 5      | 1<br>3 | 6      | 1<br>2 |   | 1<br>8 |        |   |        | 3<br>8 | 1<br>8 | 2<br>2 | 1<br>2 |   |   |   |        |   |   |   |
| (Z)- β-Ocimene                         | C <sub>10</sub> H <sub>16</sub>               | 1<br>0           |        |   | 2      |        | 3      | 6      | 3      |        |   |        |        |   |        | 2      |        |        |        |   | 2 |   |        |   |   |   |



|                                   |                                         |                  |        |        |        |   |   |        |   |  |        |   |   |   |   |   |   |        |        |        |        |        |        |   |
|-----------------------------------|-----------------------------------------|------------------|--------|--------|--------|---|---|--------|---|--|--------|---|---|---|---|---|---|--------|--------|--------|--------|--------|--------|---|
| (E)- $\beta$ -Farnesene           | C <sub>15</sub><br>H <sub>24</sub>      | 1<br>4<br>5<br>4 |        |        |        |   | 3 | 3      |   |  |        |   |   |   |   |   |   | 2      |        |        |        |        |        |   |
| Sesquibinene                      | C <sub>15</sub><br>H <sub>24</sub>      | 1<br>4<br>5<br>7 |        |        |        |   |   |        |   |  |        |   |   |   |   |   |   | 3      |        |        |        |        |        |   |
| <i>cis</i> -Muurola-4(14),5-diene | C <sub>15</sub><br>H <sub>24</sub>      | 1<br>4<br>6<br>5 |        |        |        |   |   |        |   |  |        |   |   |   |   |   |   |        |        |        |        | 2      |        |   |
| $\gamma$ -Gurjunene               | C <sub>15</sub><br>H <sub>24</sub>      | 1<br>4<br>7<br>5 |        |        |        |   |   |        |   |  |        | 3 |   |   |   |   |   |        |        |        |        |        |        |   |
| $\alpha$ -Curcumenone             | C <sub>15</sub><br>H <sub>22</sub>      | 1<br>4<br>7<br>9 |        |        |        |   |   |        |   |  |        |   |   |   |   |   |   | 3      | 2      |        |        |        |        |   |
| $\alpha$ -Amorphene               | C <sub>15</sub><br>H <sub>24</sub>      | 1<br>4<br>8<br>3 |        |        |        | 3 |   |        |   |  |        |   | 6 |   |   |   |   |        |        |        |        |        |        |   |
| <b>Germacrene D</b>               | C <sub>15</sub><br>H <sub>24</sub>      | 1<br>4<br>8<br>4 | 1<br>4 | 9<br>1 | 1<br>1 | 3 | 5 | 1<br>3 | 9 |  | 1<br>6 |   |   | 6 | 3 | 7 | 7 | 1<br>3 | 1<br>9 | 8      | 7<br>5 | 1<br>2 | 8      |   |
| $\alpha$ -Zingiberene             | C <sub>15</sub><br>H <sub>24</sub>      | 1<br>4<br>9<br>3 |        |        |        |   |   |        |   |  |        |   |   |   |   |   |   |        | 3      |        |        | 1<br>2 |        |   |
| <b>Bicylogermacrene</b>           | C <sub>15</sub><br>H <sub>24</sub>      | 1<br>5<br>0<br>0 | 4<br>5 | 1<br>8 |        |   | 3 | 4      | 2 |  |        |   |   | 4 | 4 |   |   | 1<br>1 | 9      | 8      | 7      | 3      |        |   |
| $\gamma$ -Cadinene                | C <sub>15</sub><br>H <sub>24</sub>      | 1<br>5<br>1<br>3 |        |        |        |   | 3 |        |   |  | 1<br>3 |   |   |   |   |   |   |        |        |        |        |        |        |   |
| Nootkatene                        | C <sub>15</sub><br>H <sub>22</sub>      | 1<br>5<br>1<br>7 |        |        |        |   |   |        |   |  |        |   |   |   |   |   |   |        |        | 2      |        |        | 2<br>0 |   |
| $\Delta$ -Cadinene                | C <sub>15</sub><br>H <sub>24</sub>      | 1<br>5<br>2<br>2 | 1<br>1 | 1<br>1 | 1<br>2 | 8 |   |        | 2 |  |        |   |   |   |   |   |   |        | 1<br>0 | 7      | 1<br>2 | 1<br>6 | 1<br>1 | 9 |
| <b>Spathulenol</b>                | C <sub>15</sub><br>H <sub>24</sub><br>O | 1<br>5<br>7<br>7 | 4      | 1<br>0 |        |   | 7 | 2      | 3 |  |        |   |   | 3 |   |   |   |        | 3      | 1<br>1 | 8      | 2      | 7      | 4 |
| Caryophyllene oxide               | C <sub>15</sub><br>H <sub>24</sub><br>O | 1<br>5           |        | 2      |        |   |   |        |   |  |        |   |   |   |   |   |   |        |        | 3      |        |        | 5      |   |







Table S2

| Activity                 | Extract/compounds        | The presumed mechanism of action | Tested living system/organ/cell | Result(s)                                                                                                                      | Reference(s)          |
|--------------------------|--------------------------|----------------------------------|---------------------------------|--------------------------------------------------------------------------------------------------------------------------------|-----------------------|
| Toxicity on cancer cells | Chrysosplenetin          | No data                          | MDA-MB-231 breast cancer cell   | Having selective toxicity with selectivity indices of 2.70, in comparison with tamoxifen (selectivity index:2.45)              | Delnavazi et al. 2018 |
|                          | viscosine                | No data                          | MDA-MB-231 breast cancer cell   | Having selective toxicity with selectivity indices of 3.33, in comparison with tamoxifen (selectivity index:2.45)              | Delnavazi et al. 2018 |
|                          | kumatakenin              | No data                          | MDA-MB-231 breast cancer cell   | Having selective toxicity with selectivity indices of 2.59, in comparison with tamoxifen (selectivity index:2.45)              | Delnavazi et al. 2018 |
|                          | 80% aq. Methanol extract | No data                          | HL-60 and MCF-7 cell lines      | giving IC <sub>50</sub> values of 114 and 152 µg/mL against HL-60 and MCF-7 cell lines, respectively                           | Jassbi et al. 2014    |
|                          | Ddichloromethane extract | No data                          | HL-60 and MCF-7 cell lines      | gave IC <sub>50</sub> values of 142 and 81 µg/mL against HL-60 human leukemia and MCF-7 breast cancer cell lines, respectively | Jassbi et al. 2014    |
| anxiolytic effect        | apigenin glycoside       | No data                          | Albino rats                     | Apigenin 7-glucoside significantly decreased the percentage of head dips in EPM                                                | Kumar and Bhat. 2014  |
|                          | hydroalcoholic extract   | No data                          | In vivo                         | The extract had anxiolytic effect with relatively lower sedative activity than diazepam.                                       | Rabbani et al. 2004   |
| Anti-inflammatory effect | ethyl acetate extract    | lipid peroxidation inhibitor     | In vitro assay                  | This extract inhibit lipid peroxidation with IC <sub>50</sub> values of 32 µg/mL                                               | Ghaffari et al. 2012  |
|                          | methanol extract         | lipid peroxidation inhibitor     | In vitro assay                  | This extract inhibit lipid peroxidation with IC <sub>50</sub> values of 65 µg/mL                                               | Ghaffari et al. 2012  |
|                          | hexane extract           | lipid peroxidation inhibitor     | In vitro assay                  | This extract inhibit lipid peroxidation with IC <sub>50</sub> values of 64 µg/mL                                               | Ghaffari et al. 2012  |
|                          | (-)- $\alpha$ -bisabolol | Reducing TNF- $\alpha$ level     | In vivo                         | This compound seems is related to anti-inflammatory effect of <i>S. lavandulifolia</i>                                         | Barreto et al. 2016   |

|                                                  |                                     |                        |                                                                                                                                                          |                                                                                                          |                             |
|--------------------------------------------------|-------------------------------------|------------------------|----------------------------------------------------------------------------------------------------------------------------------------------------------|----------------------------------------------------------------------------------------------------------|-----------------------------|
| Antioxidant activity                             | methanolic extract                  | Reducing free radicals | via a 2,2-diphenyl-1-picrylhydrazyl (DPPH) assay (IC <sub>50</sub> ), ferric ion reducing antioxidant power (FRAP), and total antioxidant capacity (TAC) | The extract had the antioxidant activity                                                                 | Rahimi Khoigani et al. 2017 |
| Tyrosinase inhibitory activity                   | 70% ethanol extract                 | Enzyme inhibitors      | Tyrosinase was used as substrate                                                                                                                         | Tyrosinase was sensitive against the 70% ethanol extract with IC <sub>50</sub> values of 33 µg/mL        | Tundis et al. 2015          |
|                                                  | Methanol extract                    | Enzyme inhibitors      | Tyrosinase was used as substrate                                                                                                                         | Tyrosinase was sensitive against the methanol extract with IC <sub>50</sub> values of 43 µg/mL           | Tundis et al. 2015          |
|                                                  | Acetoside compound                  | Enzyme inhibitors      | Tyrosinase was used as substrate                                                                                                                         | This compound had tyrosinase inhibitory activity with an IC <sub>50</sub> value of 13 µg/mL              | Tundis et al. 2015          |
| acetylcholinesterase (AChE) inhibitory activity  | hexane and dichloromethane extracts | Enzyme inhibitors      | Acetylcholinesterase was used as substrate                                                                                                               | These extracts exhibited the highest inhibitory against AChE with an IC <sub>50</sub> value of 14 µg/mL  | Tundis et al. 2015          |
| butyrylcholinesterase (BChE) inhibitory activity | hexane and dichloromethane extracts | Enzyme inhibitors      | Butyrylcholinesterase was used as substrate                                                                                                              | These extracts exhibited the highest inhibitory against AChE with an IC <sub>50</sub> value of 144 µg/mL | Tundis et al. 2015          |
| gastroprotective effects                         | Aqueous extract                     | No data                | Male Wistar rats                                                                                                                                         | This extract protected gastric mucosa from alcohol-induced gastric ulcers                                | Nabavizadeh 2011            |
| Protective effect in gentamicin nephrotoxicity   | Hydroethanolic extract              |                        | Male Wistar rats                                                                                                                                         | The plant can be reduce gentamicin-induced nephrotoxicity                                                | Feyzi et al. 2020           |

|                           |                                                  |                                                                                                                             |                                                                  |                                                                      |                              |
|---------------------------|--------------------------------------------------|-----------------------------------------------------------------------------------------------------------------------------|------------------------------------------------------------------|----------------------------------------------------------------------|------------------------------|
| spasmolytic effect        | Chloroform fraction                              | Inhibition of ileum contractility mainly via disturbing the calcium mobilization and partly by opioid receptors' activation | Male Wistar rats                                                 | The plant had activity with $IC_{50} = 0.13 \pm 0.02$ mg/mL          | Gharib-Naseri et al. 2011    |
| Abortion                  | Hydroalcoholic extract                           | Decrease in progesterone levels                                                                                             | 72 adult pregnant Wistar rats                                    | Significant decrease in the estrogen and progesterone levels         | Ahmadi moghammad et al. 2021 |
| Antioxidant activity      | Infusion from 3 g aerial parts on a daily basis  | Increase in the total content of serum antioxidants and prevent cellular lipid peroxidation                                 | Clinical trial on 26 healthy human subjects                      | Total blood antioxidants increased<br>The lipid peroxidation reduced | Rahzani et al. 2013 .        |
| Primary dysmenorrhea      | Powdered aerial parts of the plant (capsule)     | Inhibition of prostaglandin synthesis by cyclooxygenase 1 and 2 inhibition                                                  | Clinical trial on twenty-nine patients with primary dysmenorrhea | Reduce menstrual pain                                                | Monji et al. 2018            |
| Abnormal uterine bleeding | Brew of the dried aerial parts three times a day | Downregulation of estrogenic receptors                                                                                      | Clinical trial on 66 patients with Polycystic ovarian syndrome   | Reduced abnormal uterine bleeding                                    | Jalilian et al. 2013 .       |
